# Supplementary material for: Anti-Dipeptidyl-peptidase-like protein-6 Antibody-Associated Encephalitis Masquerading as Weight Loss and Confusion: A Case Report
Source: Research Square preprint supplement (doi:10.21203/rs.3.rs-6614556/v1), 2025-06-09
Supplement: Supplementary file 1 [file 7cda8ff797ac765b4db72119.docx]

| **Table 1** |  |  |  |
| --- | --- | --- | --- |
| **Clinical Features** | **Present Case** | **Literature Review*** | **Reference** |
| Age At Onset | 38 | Median 53 (range 13-75) | [9] |
| Initial Weight Loss | 250 lbs. | Median 75 lbs. (range 51-115) | [9] |
| Gender | Female | Male: Female 2:1 | [13] |
| Psychiatric Symptoms | Present | 40% of cases | [12] |
| CNS Hyperexcitability | Present | 64% of cases | [12] |
| Response To Immunotherapy | Partial | Complete: 22%, Partial: 28%, Unchanged: 33%, Worsened: 17% | [9] |
| *Data compiled from multiple reference studies | | |  |
